# Supplementary material for: Effect of dietary supplementation with multinutrient soy flour on body composition and cognitive function in elderly individuals at the risk of low protein: a randomized, double-blind, placebo-controlled study
Source: Royal Society of Chemistry journal article supplement (doi:10.1039/d3fo02905k), 2023-01-01
Supplement: d3fo02905k4.pdf [file d3fo02905k4.pdf]

**Supplementary data**

**Table S1** Characteristics of all subjects (n=733)

| Characteristics  |                     | Female (n=412) | Male (n=321) | Total        | <i>P</i> -value <sup>a</sup> |
|------------------|---------------------|----------------|--------------|--------------|------------------------------|
| Age (Years)      |                     | 71.50±5.97     | 71.74±5.91   | 71.61 ± 5.94 | 0.59                         |
| Education        | Illiterate          | 246(64.1)      | 44(15.2)     | 290(43)      | <0.001                       |
|                  | Primary             | 110(28.6)      | 153(52.8)    | 263(39)      |                              |
|                  | High school & above | 28(7.3)        | 93(32.1)     | 121(18)      |                              |
| Marital status   | unmarried           | 2(0.5)         | 5(1.7)       | 7(1)         | <0.001                       |
|                  | Married             | 272(70.8)      | 253(87.2)    | 525(77.9)    |                              |
|                  | Widow               | 110(28.6)      | 31(10.7)     | 141(20.9)    |                              |
|                  | divorced            | 0(0)           | 1(0.3)       | 1(0.1)       |                              |
| Smoke            | Yes                 | 42(11)         | 149(51.4)    | 191(28.5)    | <0.001                       |
|                  | No                  | 339(89)        | 141(48.6)    | 480(71.5)    |                              |
| Drink            | Yes                 | 41(10.8)       | 152(52.6)    | 193(28.8)    | <0.001                       |
|                  | No                  | 340(89.2)      | 137(47.4)    | 477(71.2)    |                              |
| Body composition |                     |                |              |              |                              |
| Protein (kg)     | Bellow standard     | 82(19.9)       | 175(54.5)    | 257(35.1)    | <0.001                       |
|                  | Above standard      | 330(80.1)      | 146(45.5)    | 476(64.9)    |                              |
| Protein (kg)     | Deficiency          | 21(5.1)        | 64(19.9)     | 85(11.6)     | <0.001                       |
|                  | Normal              | 391(94.9)      | 257(80.1)    | 648(88.4)    |                              |
| Mineral (kg)     | Bellow standard     | 48(11.7)       | 96(29.9)     | 144(19.6)    | <0.001                       |
|                  | Above standard      | 364(88.3)      | 225(70.1)    | 589(80.4)    |                              |
| Mineral (kg)     | Deficiency          | 6(1.5)         | 20(6.2)      | 26(3.5)      | <0.01                        |
|                  | Normal              | 406(98.5)      | 301(93.8)    | 707(96.5)    |                              |

a: comparison of change between Female and Male

**Table S2** Correlations between protein and MMSE-score

|            | Protein (kg)   |                   |
|------------|----------------|-------------------|
|            | <i>P</i> value | <i>R</i> Spearman |
| MMSE-score | <0.001         | 0.370             |

**Table S3** Usual dietary Intake and the prevalence of inadequacy of micronutrients

|                        | Female (n=17)         |               | Male (n=43)           |               |
|------------------------|-----------------------|---------------|-----------------------|---------------|
|                        | Mean $\pm$ SD         | Below RNI (%) | Mean $\pm$ SD         | Below RNI (%) |
| Energy (MJ/d)          | 5.42 $\pm$ 1.72       | 82.4          | 6.12 $\pm$ 1.56       | 93            |
| Protein (g/d)          | 36.45 $\pm$ 10.37     | 100.0         | 41.72 $\pm$ 13.07     | 93.0          |
| Fat (%)                | 33.81 $\pm$ 11.69     | 11.8          | 33.84 $\pm$ 13.94     | 16.3          |
| Carbohydrate (%)       | 55.12 $\pm$ 11.76     | 29.4          | 53.80 $\pm$ 13.71     | 41.9          |
| Vitamin A( $\mu$ g/d)& | 194.55 $\pm$ 135.29   | 100.0         | 270.46 $\pm$ 628.96   | 97.7          |
| Vitamin B1 (mg/d)      | 0.47 $\pm$ 0.24       | 100.0         | 0.47 $\pm$ 0.18       | 100.0         |
| Vitamin B2 (mg/d)      | 0.52 $\pm$ 0.21       | 100.0         | 0.56 $\pm$ 0.26       | 97.7          |
| Vitamin C (mg/d)       | 29.59 $\pm$ 19.01     | 100.0         | 32.93 $\pm$ 26.8      | 97.7          |
| Vitamin E (mg/d)&      | 18.31 $\pm$ 10.96     | 52.9          | 21.49 $\pm$ 13.14     | 30.2          |
| Vitamin PP (mg /d) &   | 5.85 $\pm$ 3.36       | 88.2          | 5.63 $\pm$ 3.15       | 100.0         |
| Potassium (mg/d)       | 1055.34 $\pm$ 302.39  | 100.0         | 1103.25 $\pm$ 338.75  | 100.0         |
| Sodium (mg/d)          | 3458.79 $\pm$ 1001.15 | -             | 3475.10 $\pm$ 1346.61 | 2.3           |
| Calcium (mg/d)         | 264.59 $\pm$ 130.53   | 100.0         | 251.03 $\pm$ 179.63   | 100.0         |
| Magnesium (mg/d)       | 191.88 $\pm$ 76.30    | 94.1          | 216.94 $\pm$ 79.05    | 93.0          |
| Iron (mg/d)            | 12.42 $\pm$ 5.25      | 58.8          | 13.73 $\pm$ 4.60      | 27.9          |
| Manganese (mg/d)       | 3.88 $\pm$ 2.29       | 64.7          | 4.23 $\pm$ 1.65       | 55.8          |
| Zinc (mg/d)            | 5.20 $\pm$ 1.42       | 100.0         | 6.13 $\pm$ 1.77       | 100.0         |
| Copper (mg/d)          | 1.06 $\pm$ 0.62       | 47.1          | 1.11 $\pm$ 0.46       | 25.6          |
| Phosphorus (mg/d)      | 592.75 $\pm$ 145.88   | 76.5          | 682.82 $\pm$ 200.55   | 53.5          |
| Selenium ( $\mu$ g/d)  | 32.54 $\pm$ 12.57     | 94.1          | 41.10 $\pm$ 19.74     | 88.4          |

Chinese Dietary Reference Intakes (DRIs) 2013. &:  $\mu$ g retinol Retinol Activity Equivalents (RAE) per day; mg  $\alpha$ -tocopherol equivalent (TE) per day; mg **Niacin Equivalence (NE)per day**.

**Table S4 Mini-Mental State Examination**

| Maximum Score | Patient's Score | Questions                                                                                                                                                                                                                                                                   |
|---------------|-----------------|-----------------------------------------------------------------------------------------------------------------------------------------------------------------------------------------------------------------------------------------------------------------------------|
| 5             |                 | “What is the year? Season? Date? Day? Month?”                                                                                                                                                                                                                               |
| 5             |                 | “Where are we now? State? County? Town/city? Hospital? Floor?”                                                                                                                                                                                                              |
| 3             |                 | The examiner names three unrelated objects clearly and slowly, then the instructor asks the patient to name all three of them. The patient's response is used for scoring. The examiner repeats them until patient learns all of them, if possible.                         |
| 5             |                 | “I would like you to count backward from 100 by sevens.” (93, 86, 79, 72, 65, ...)<br>Alternative: “Spell WORLD backwards.” (D-L-R-O-W)                                                                                                                                     |
| 3             |                 | “Earlier I told you the names of three things. Can you tell me what those were?”                                                                                                                                                                                            |
| 2             |                 | Show the patient two simple objects, such as a wristwatch and a pencil, and ask the patient to name them.                                                                                                                                                                   |
| 1             |                 | “Repeat the phrase: ‘No ifs, ands, or buts.’”                                                                                                                                                                                                                               |
| 3             |                 | “Take the paper in your right hand, fold it in half, and put it on the floor.” (The examiner gives the patient a piece of blank paper.)                                                                                                                                     |
| 1             |                 | “Please read this and do what it says.” (Written instruction is “Close your eyes.”)                                                                                                                                                                                         |
| 1             |                 | “Make up and write a sentence about anything.” (This sentence must contain a noun and a verb.)                                                                                                                                                                              |
| 1             |                 | “Please copy this picture.” (The examiner gives the patient a blank piece of paper and asks him/her to draw the symbol below. All 10 angles must be present and two must intersect.)<br>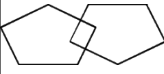 |
| 30            |                 | TOTAL                                                                                                                                                                                                                                                                       |

**Table S5 Means ± Standard Deviation for Body composition at baseline, endpoint and for overall change.**

| <b>Body composition</b> |          | <b>MNSF</b>  | <b>Soy Flour</b> | <b><i>P</i>-value<sup>a</sup></b> |
|-------------------------|----------|--------------|------------------|-----------------------------------|
| ICW(L)                  | baseline | 17.43±2.74   | 16.62±2.70       | 0.20                              |
|                         | endpoint | 17.83±2.82   | 16.81±2.67       | 0.08                              |
|                         | change   | 0.40±0.98    | 0.20±1.82        | 0.38                              |
|                         | <i>P</i> | <0.05        | 0.41             |                                   |
| ECW(L)                  | baseline | 11.28±1.70   | 10.75±1.67       | 0.12                              |
|                         | endpoint | 11.50±1.79   | 10.85±1.73       | 0.05                              |
|                         | change   | 0.22±0.64    | 0.10±1.19        | 0.37                              |
|                         | <i>P</i> | <0.05        | 0.52             |                                   |
| TBW(L)                  | baseline | 28.72±4.43   | 27.37±4.37       | 0.16                              |
|                         | endpoint | 29.33±4.58   | 27.69±4.41       | 0.07                              |
|                         | change   | 0.60±1.60    | 0.31±3.01        | 0.45                              |
|                         | <i>P</i> | <0.05        | 0.39             |                                   |
| BFR(%)                  | baseline | 23.30±8.62   | 24.38±7.60       | 0.61                              |
|                         | endpoint | 25.93±8.12   | 27.54±9.48       | 0.48                              |
|                         | change   | 2.64±4.09    | 3.16±8.34        | 0.62                              |
|                         | <i>P</i> | <0.01        | <0.01            |                                   |
| FM(Kg)                  | baseline | 12.58±6.46   | 12.24±5.05       | 0.87                              |
|                         | endpoint | 14.58±6.45   | 14.67±5.93       | 0.95                              |
|                         | change   | 2.00±2.00    | 2.44±4.25        | 0.68                              |
|                         | <i>P</i> | <0.001       | <0.001           |                                   |
| VFA(cm <sup>2</sup> )   | baseline | 123.76±21.82 | 123.68±15.34     | 0.99                              |
|                         | endpoint | 130.46±22.62 | 131.50±21.20     | 0.86                              |
|                         | change   | 6.70±6.53    | 7.82±14.68       | 0.62                              |
|                         | <i>P</i> | <0.001       | <0.01            |                                   |

ICW: Intracellular Water; ECW: Extracellular Water; TBW: Total body water; BFR: Body fat ratio; FM: Fat mass; VFA: visceral fat area

*P*: Significant differences between baseline and 12- week were identified;

a: comparison of change between MNSF and Soy Flour
