# Supplementary figures and images for: Effect of dietary supplementation with multinutrient soy flour on body composition and cognitive function in elderly individuals at the risk of low protein: a randomized, double-blind, placebo-controlled study
Source: Royal Society of Chemistry journal article supplement (doi:10.1039/d3fo02905k), 2023-01-01

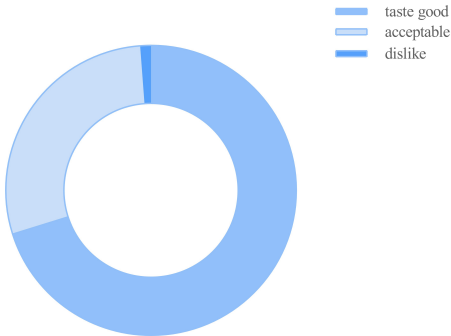

**Taste feeling**

Supplement: d3fo02905k2.pdf [file d3fo02905k2.pdf]

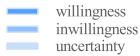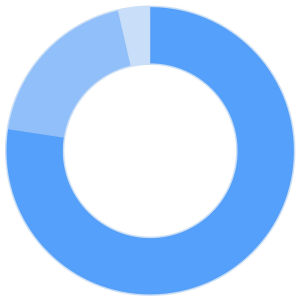

**Purchase intention**

Supplement: d3fo02905k3.pdf [file d3fo02905k3.pdf]
